# Supplementary material
Source: HighWire-hosted journal article supplement (https://cebp.aacrjournals.org/content/suppl/2019/12/04/1055-9965.EPI-19-1044)
Supplement: 227916_2_supp_5861002_q1ygjm.pdf [file 227916_2_supp_5861002_q1ygjm.pdf]

**Supplementary Table 1. ICD-9 codes for outcome and covariates**

| <b>Outcome</b>                                                                              | <b>ICD-9 coding</b>                                                                                |
|---------------------------------------------------------------------------------------------|----------------------------------------------------------------------------------------------------|
| Gastric cancer                                                                              | 151, 151.0, 151.1, 151.2, 151.3, 151.4, 151.5, 151.6, 151.8, 151.9, 230.2                          |
| <b>Covariates</b>                                                                           |                                                                                                    |
| Smoking and its related disease (chronic obstructive pulmonary diseases)                    | 491, 492, 496, V15.82                                                                              |
| Alcohol-related diseases (gastrointestinal, hepatic, psychiatric and neurological diseases) | 291, 303, 305.0, 571.0, 571.1, 571.2, 571.3, 980.8, 980.9                                          |
| Gastric ulcer                                                                               | 531                                                                                                |
| Duodenal ulcer                                                                              | 532                                                                                                |
| Diabetes mellitus                                                                           | 249, 250                                                                                           |
| Hypertension                                                                                | 401-405                                                                                            |
| Dyslipidemia                                                                                | 272.0-272.4                                                                                        |
| Obesity                                                                                     | 278.0, 278.1                                                                                       |
| Ischemic heart disease                                                                      | 410-413, 414.0, 414.8, 414.9, 429.7                                                                |
| Atrial fibrillation                                                                         | 427.3                                                                                              |
| Congestive heart failure                                                                    | 402.01, 402.11, 402.91, 404.01, 404.03, 404.11, 404.13, 404.91, 404.93, 428                        |
| Stroke                                                                                      | 430-432, 433.01, 433.11, 433.21, 433.31, 433.81, 433.91, 434.01, 434.11, 434.91, 436, 437.0, 437.1 |
| Chronic renal failure                                                                       | 585                                                                                                |
| Cirrhosis                                                                                   | 571.2, 571.5, 571.6, 572.2-572.4, 573.5                                                            |
